# Supplementary material
Source: MDPI journal article supplement (https://www.mdpi.com/2076-3417/9/4/653)
Supplement: s1 [file s1]

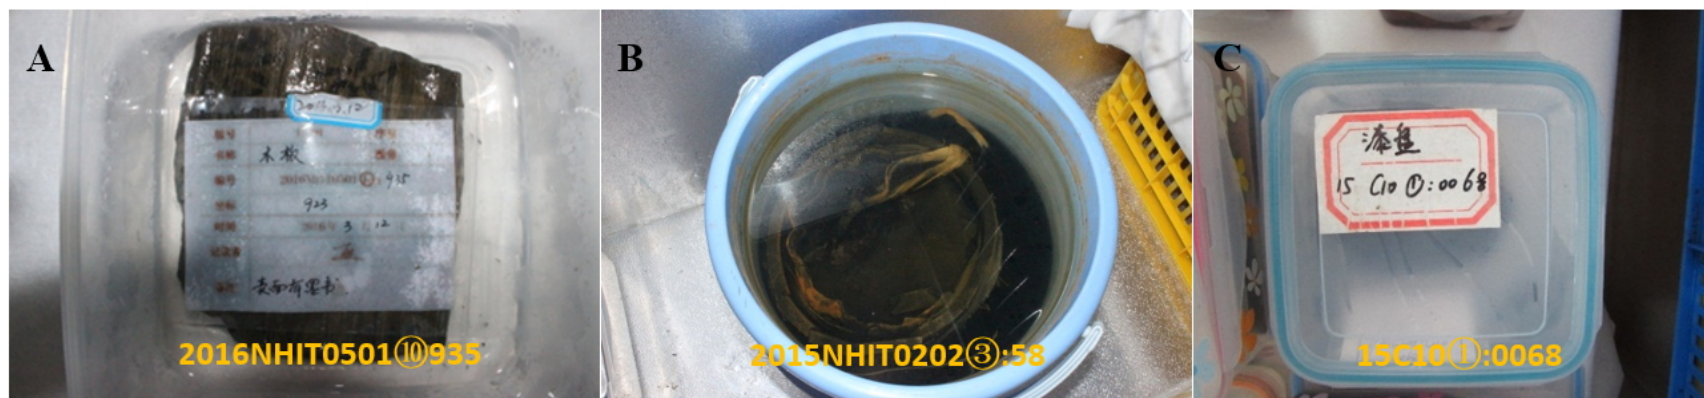

**Figure S1.** The form of lacquer plates soaking in the water. (a) Sample No. 9 collected in June 2017 was from the stored water sample named 2016NHIT0501⑩:935. (b) Sample No. 10 collected in June 2017 and No. NHWS03 collected in December 2017 were from the stored water named 2015NHIT0202③:58. Samples No. 10 and No. NHWS03 were collected at different times from the same stored water. (c) Sample No. NHWS04 collected in December 2017 was from the stored water named 15C10①:0068.

**Table S1.** Describe the effectivity of different biocides against different strains.

| Strain                               | Biocides effectivity |
|--------------------------------------|----------------------|
| <i>Microbacterium</i> sp. NK-NH4     | 20N>D7>P91>K100      |
| <i>Bacillus tequilensis</i> NK-NH5   | D7>20N>P91>K100      |
| <i>Bacillus subtilis</i> NK-NH6      | 20N>D7>P91>K100      |
| <i>Pseudomonas</i> sp. NK-NH7        | 20N>D7>P91>K100      |
| <i>Bacillus</i> sp. NK- NH8          | 20N≈D7>P91>K100      |
| <i>Ochrobactrum</i> sp. NK- NH9      | 20N>P91>D7>K100      |
| <i>Bacillus meqaterium</i> NK- NH10  | D7>20N>P91>K100      |
| <i>Bacillus velezensis</i> .NK- NH11 | D7>20N>P91>K100      |
| <i>Stenotrophomonas</i> sp. NK- NH14 | D7>20N≈P91>K100      |

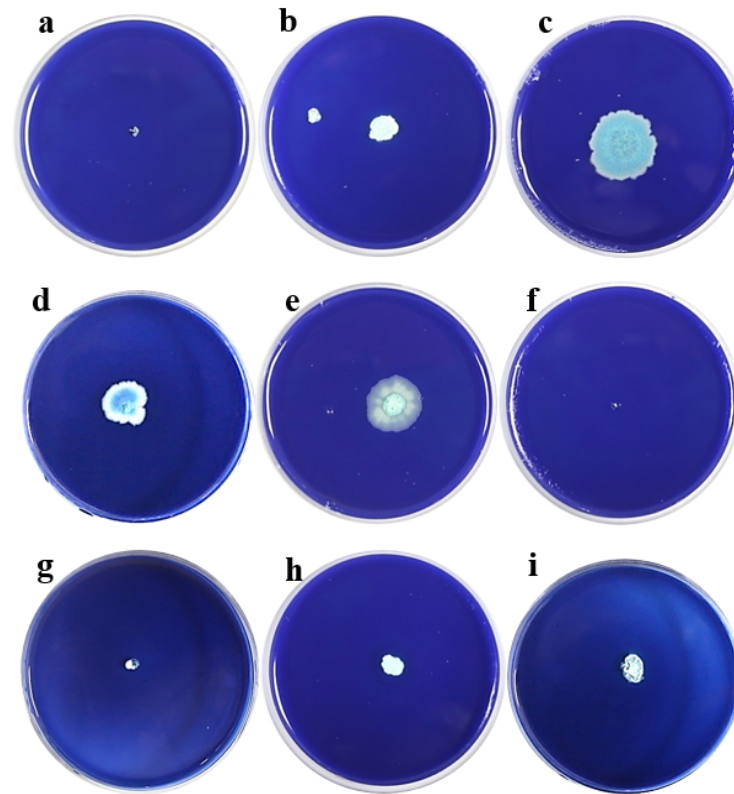

**Figure S2.** Colonies of 9 strains grown on azure plates at 28 °C for 4 days. (a) *Microbacterium* sp. NK-NH4; (b) *Bacillus tequilensis* NK-NH5; (c) *Bacillus subtilis* NK-NH6; (d) *Pseudomonas* sp. NK-NH7; (e) *Bacillus* sp. NK-NH8; (f) *Ochrobactrum* sp. NK-NH9; (g) *Bacillus megaterium* NH10; (h) *Bacillus velezensis* NK-NH11; and (i) *Stenotrophomonas* sp. NK-NH14.
